# Supplementary material
Source: HighWire-hosted journal article supplement (https://fn.bmj.com/content/105/3/322)
Supplement: inline-supplementary-material-2 [file inline-supplementary-material-2.pdf]

**Supplemental Table: Echocardiogram assessments**

| <b>Characteristic</b>                                                         | <b>Trial Participants (n=18)</b> | <b>Historical Control (n=18)</b> |
|-------------------------------------------------------------------------------|----------------------------------|----------------------------------|
| Estimated right ventricular pressure above right atrium (mm Hg), median (IQR) | 51 (41, 54)<br>(n=11)            | 49 (39, 50)<br>(n=11)            |
| Direction of shunting at ductus arteriosus                                    |                                  |                                  |
| Left to right                                                                 | 0                                | 2                                |
| Bidirectional                                                                 | 14                               | 8                                |
| Right to left                                                                 | 3                                | 8                                |
| No patent ductus arteriosus                                                   | 1                                | 0                                |
| Interventricular septal position                                              |                                  |                                  |
| Flattened                                                                     | 7                                | 11                               |
| Bowing                                                                        | 11                               | 7                                |
| Severity of pulmonary hypertension*                                           |                                  |                                  |
| Mild                                                                          | 0                                | 1                                |
| Moderate                                                                      | 6                                | 7                                |
| Severe                                                                        | 12                               | 10                               |

IQR: interquartile range

\*Based on the most severe assessment across all three assessments
